# Supplementary material for: Novel Ru(ii) complexes with multiple anticancer photoreactivity: ligand exchange, photoredox catalysis, reactive oxygen generation and endoperoxide formation
Source: Royal Society of Chemistry journal article supplement (doi:10.1039/d3cp02346j), 2023-01-01
Supplement: d3cp02346j1.pdf [file d3cp02346j1.pdf]

## Supporting Information

### Novel Ru(II) complexes with multiple anticancer photoreactivity: ligand exchange, photoredox catalysis, reactive oxygen generation and endoperoxide formation

Anyi Dao,<sup>a</sup> HaoRui Wu,<sup>a</sup> Siqi Wei,<sup>a</sup> Huaiyi Huang\*<sup>a</sup>

<sup>a</sup> School of Pharmaceutical Science (Shenzhen), Shenzhen campus of Sun Yat-sen University, No.66, Gongchang Road, Shenzhen 518107, China

#### 1. Schemes

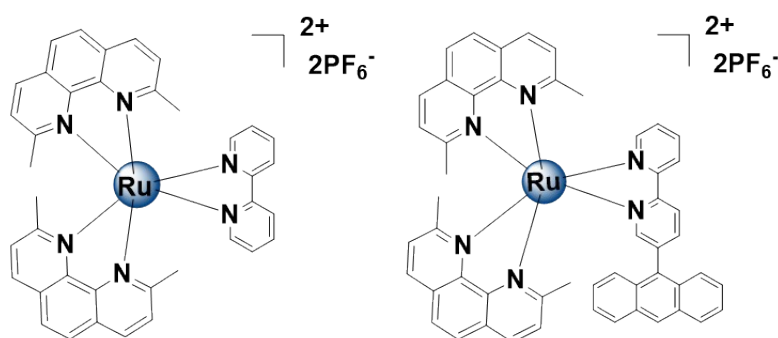

Scheme S1. Structure of Ru1 and Ru2.

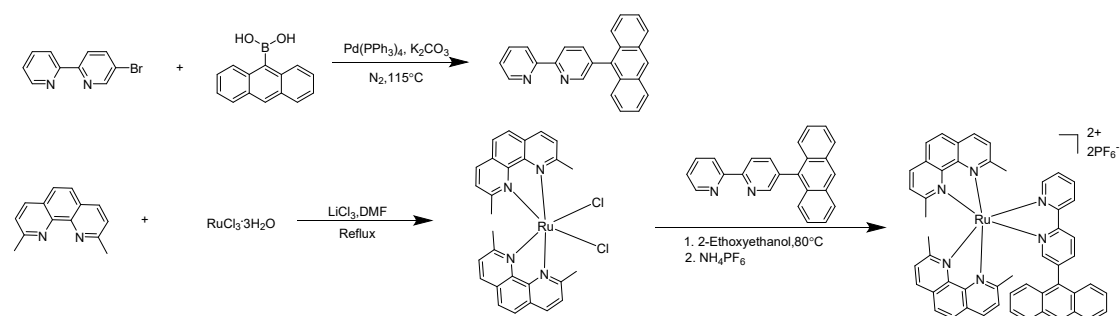

Scheme S2. Synthetic scheme for complex Ru2.

## 2. Figures

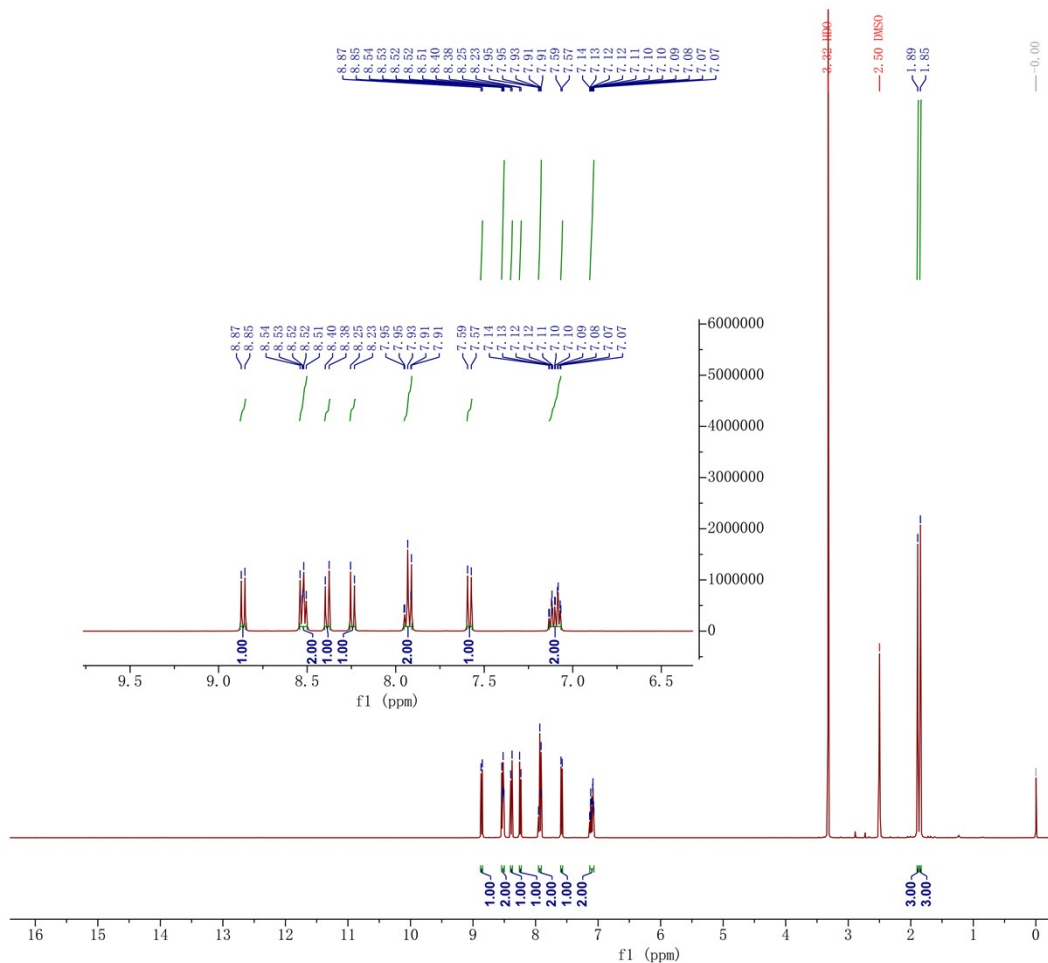



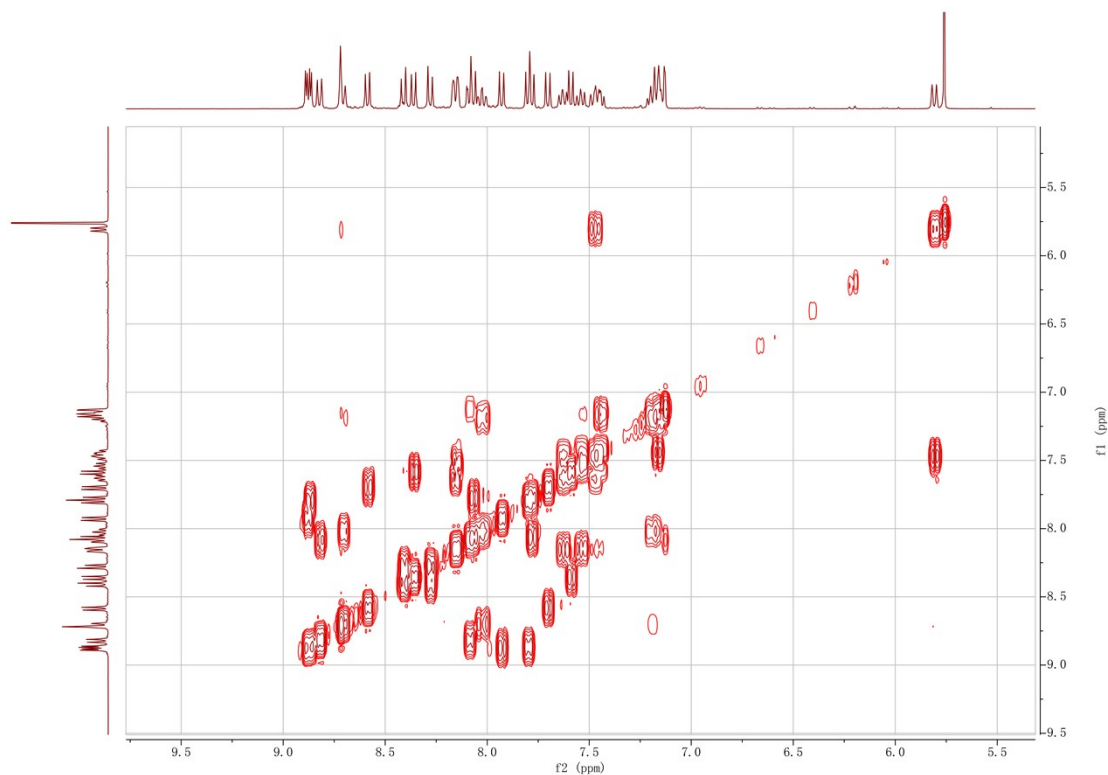

**Fig. S2.**  $^1\text{H}$ - $^1\text{H}$  COSY spectra (500 MHz,  $\text{DMSO-}d_6$ ) of **Ru1** and **Ru2**.

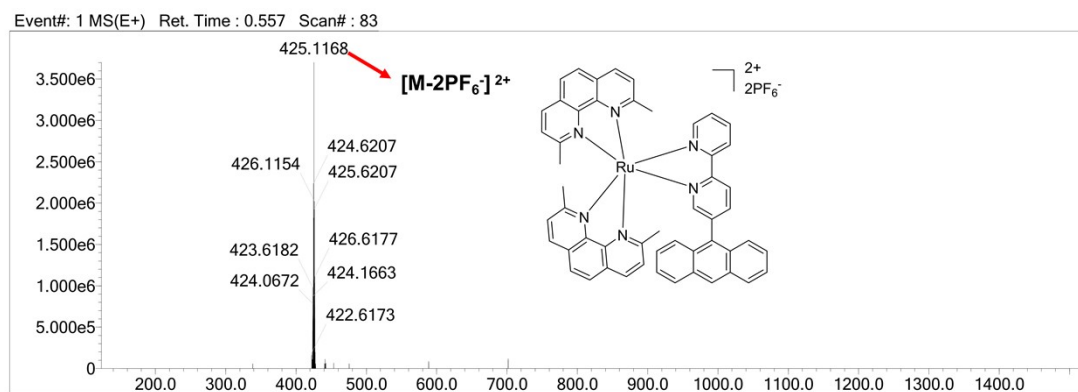

**Fig. S3.** HR-ESI-MS spectra of **Ru2**.

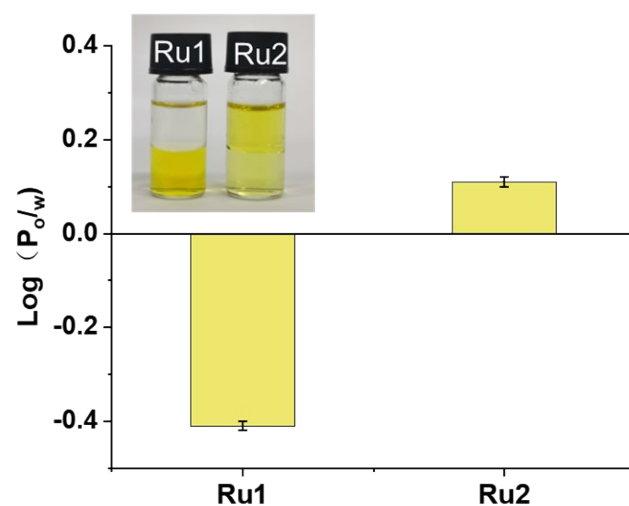

Fig. S4. Octanol/water partition coefficients of **Ru1** and **Ru2**.

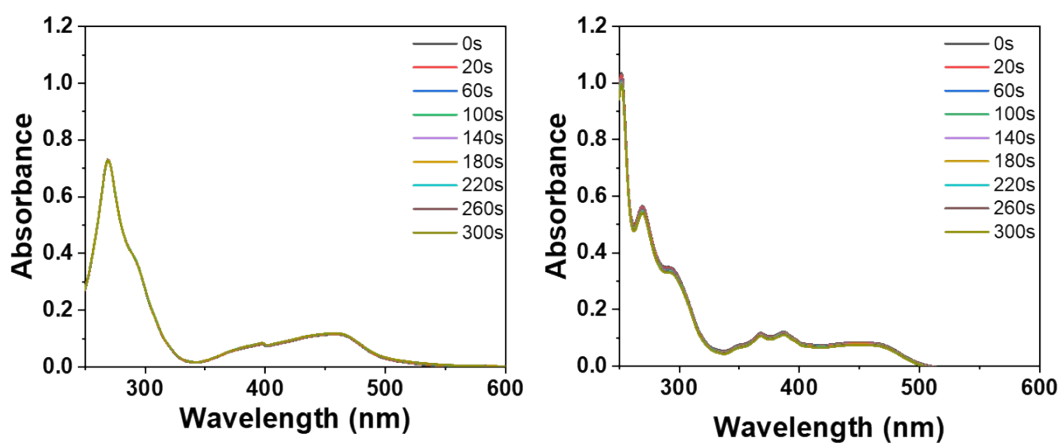

Fig. S5. Dark stability of **Ru1** (Left) and **Ru2** (Right) in PBS.

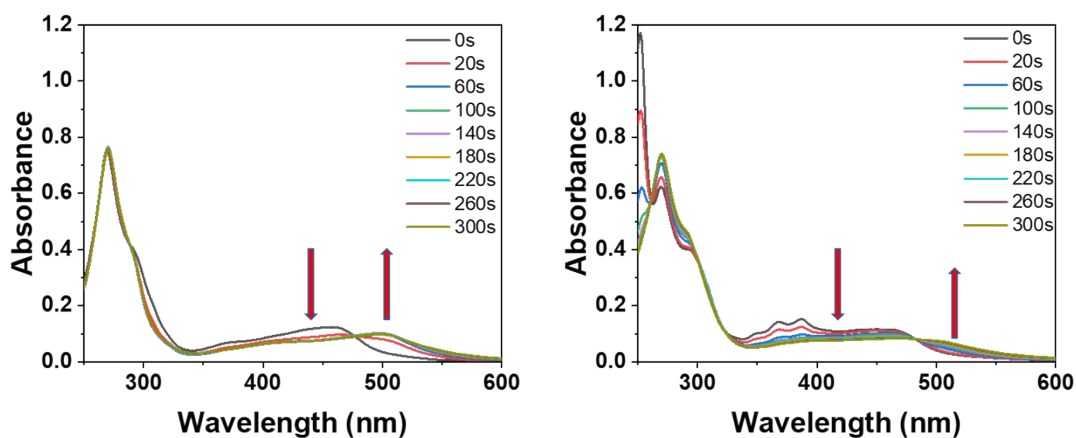

Fig. S6. Absorption spectra changes of **Ru1**(Left) and **Ru2**(Right) upon white light irradiation ( $11.6 \text{ J/cm}^2$ ).

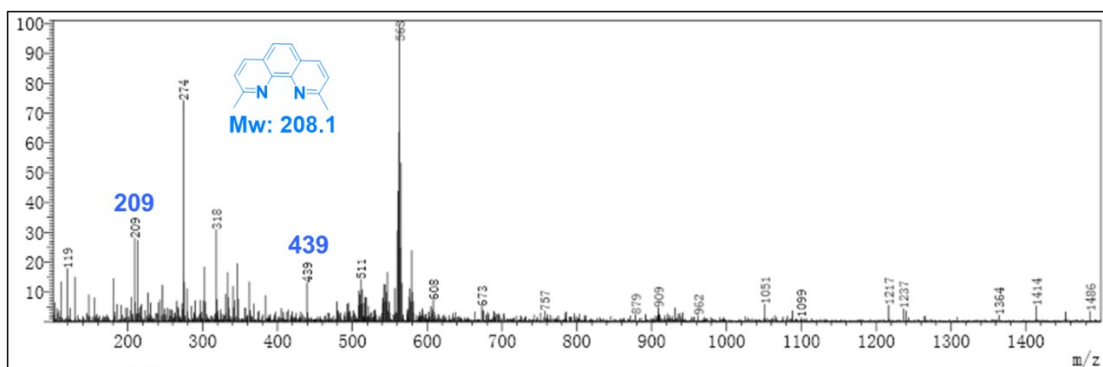

**Fig. S7.** Mass spectra showing ligand dissociation of **Ru1** in methanol after illumination ( $11.6 \text{ J/cm}^2$ ).

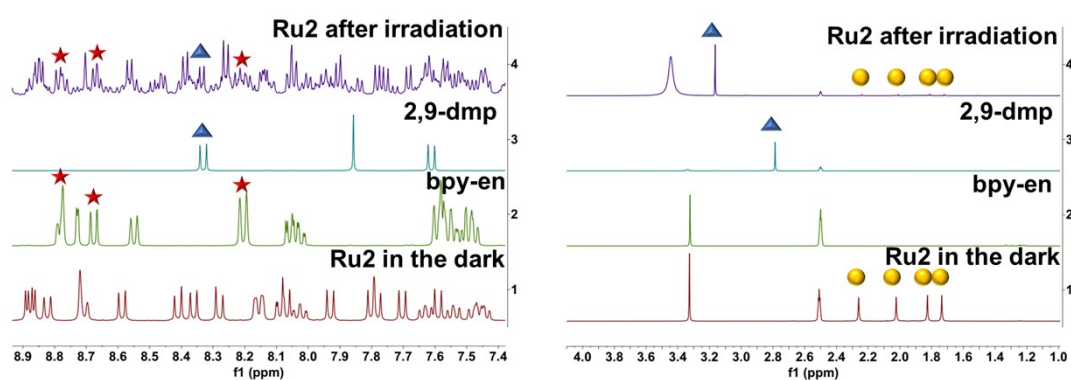

**Fig. S8.**  $^1\text{H}$  NMR spectra showing ligand dissociation of **Ru2** after illumination ( $11.6 \text{ J/cm}^2$ ).

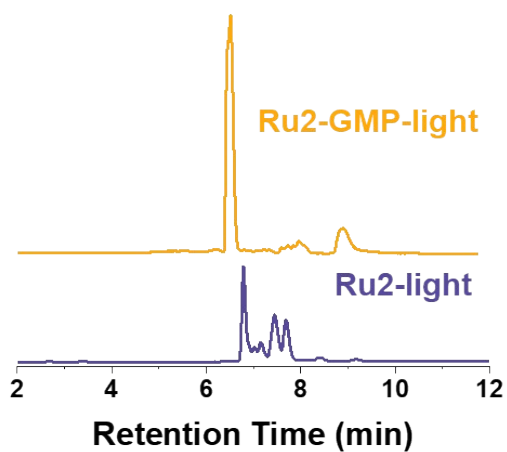

**Fig. S9.** HPLC of GMP and **Ru2** after irradiation. ( $11.6 \text{ J/cm}^2$ ).

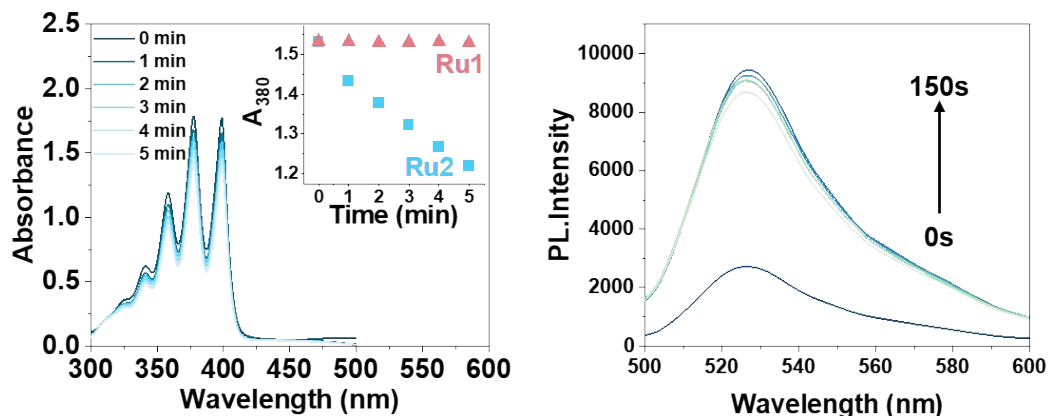

**Fig. S10.**  $^1\text{O}_2$  generation by **Ru2** ( $10\ \mu\text{M}$ ) upon white light irradiation ( $38.6\ \text{mW}/\text{cm}^2$ ) with ABDA (left) and SOSG (right).

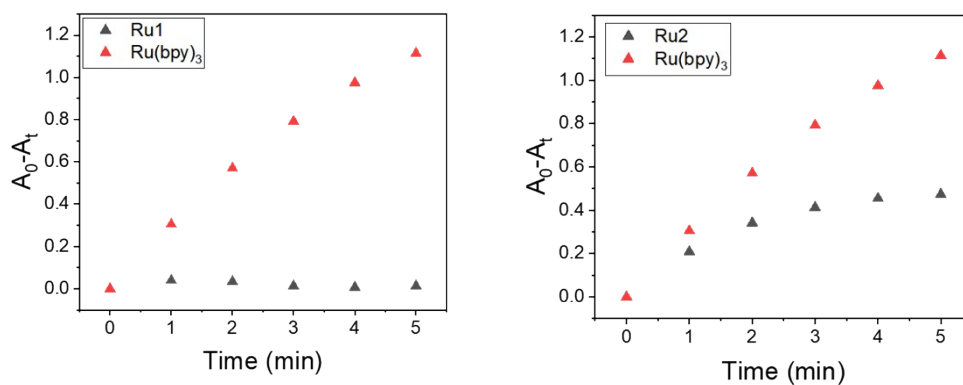

**Fig. S11.** Determination of the quantum yield for the  $^1\text{O}_2$  generation by the complex **Ru1** and **Ru2** or  $\text{Ru}(\text{bpy})_3\text{Cl}_2$  (as reference) in PBS under white light irradiation.

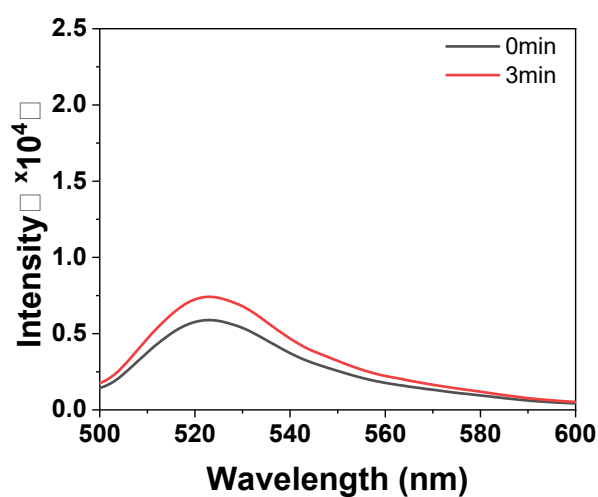

**Fig. S12.** Fluorescence intensity changes of DHR123 ( $10\ \mu\text{M}$ ) in the dark.

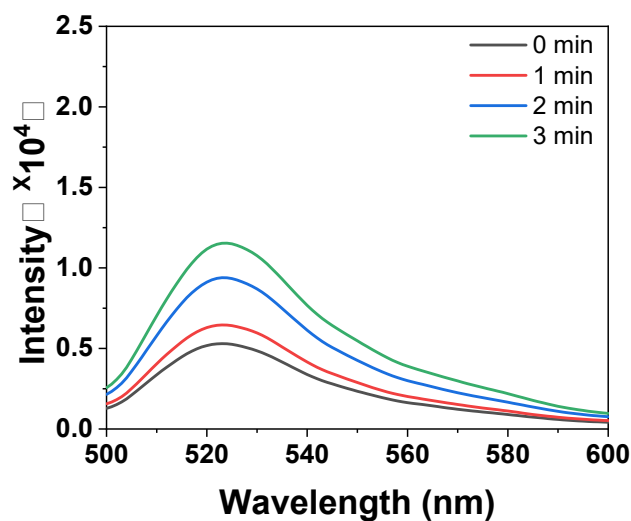

**Fig. S13.**  $O_2^{\cdot -}$  detection using the DHR123 ( $10 \mu M$ ) assay for Ru1 ( $5 \mu M$ ) in aqueous solution after white light irradiation ( $7 J/cm^2$ ).

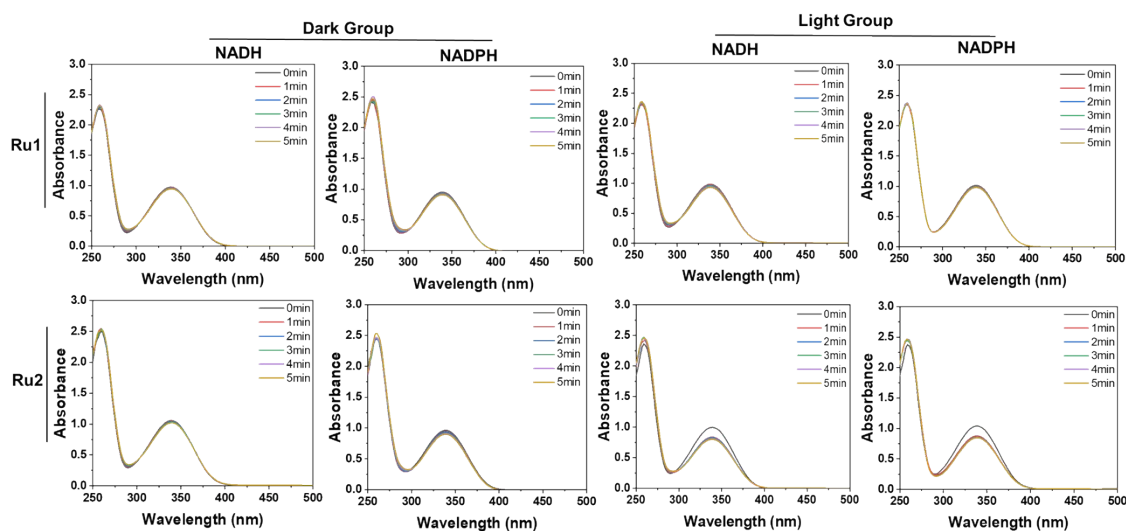

**Fig. S14.** UV-vis spectra showing the photocatalytic oxidation of NADH ( $160 \mu M$ ) and NADPH ( $160 \mu M$ ) by Ru1 and Ru2 ( $10 \mu M$ ) in aqueous solution.

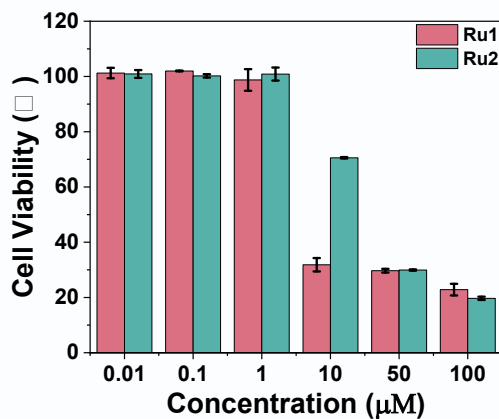

**Fig. S15.** Dark toxicity of Ru2 toward non-tumorigenic cell lines HEK-293T.



|           | A549(21% O <sub>2</sub> ) |                    |                 | A549(5% O <sub>2</sub> ) |                    |                 |
|-----------|---------------------------|--------------------|-----------------|--------------------------|--------------------|-----------------|
|           | Dark <sup>a</sup>         | Light <sup>b</sup> | PI <sup>c</sup> | Dark <sup>a</sup>        | Light <sup>b</sup> | PI <sup>c</sup> |
| Ru1       | 28.3±1.6                  | 8.8±0.7            | 3.2             | >100                     | 40.7±2.1           | 2.5             |
| Ru2       | 65.0±1.1                  | 0.29±0.04          | 224.1           | 81.3±3.1                 | 10.3±2.8           | 7.9             |
| Cisplatin | 2.4±0.2                   | 1.8±0.1            | 1.3             | 3.7±1.4                  | 4.1±1.5            | 0.9             |
| 5-FU      | 67.1±1.4                  | 66.8±1.1           | 1.0             | 88.3±0.9                 | 86.4±1.2           | 1.0             |
| Ce6       | 22.4±0.7                  | 0.21±0.08          | 106.7           | 17.4±2.3                 | 8.4±1.7            | 2.1             |

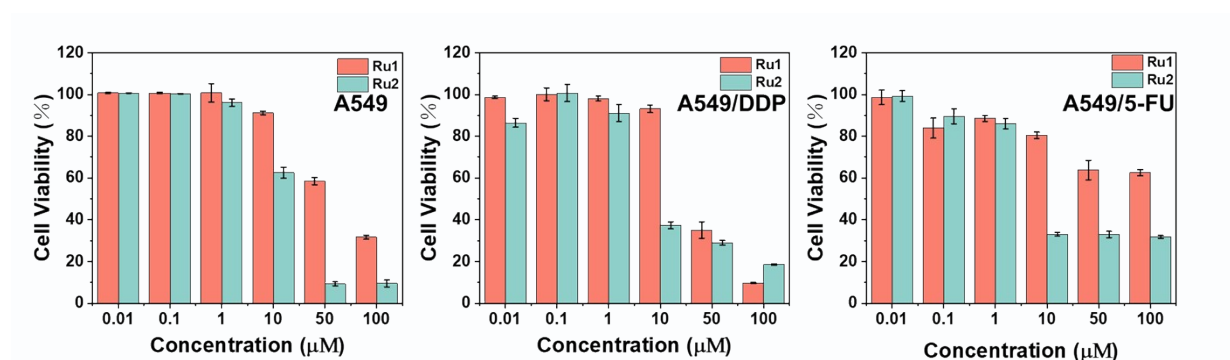

**Fig. S16.** Antiproliferative activity of **Ru1** and **Ru2** against different tumor cell lines under hypoxia (5% O<sub>2</sub>) conditions.

### 3. Tables

**Table S1.** Dark and photo IC<sub>50</sub> values (μM) and photo-cytotoxicity index (PI = IC<sub>50</sub> dark/IC<sub>50</sub> light) in A549 cells under normoxic and hypoxic conditions

<sup>a</sup>48 h drug exposure in the dark.

<sup>b</sup>16h drug exposure in the dark, followed by white light irradiation (11.6 J/cm<sup>2</sup>) for 5 min and further 32 h incubation.

<sup>c</sup>PI = IC<sub>50</sub>(Dark<sup>a</sup>) / IC<sub>50</sub>(Light<sup>b</sup>).

5-FU =5-Fluorouracil, n.a. = Not applicable.

**Table S2.** Dark and photo IC<sub>50</sub> values (μM) and photo-cytotoxicity index (PI = IC<sub>50</sub> dark/IC<sub>50</sub> light) in A549/5-FU cells under normoxic and hypoxic conditions

|             | A549/5-FU(21% O <sub>2</sub> ) |                    |                 | A549/5-FU(5% O <sub>2</sub> ) |                    |                 |
|-------------|--------------------------------|--------------------|-----------------|-------------------------------|--------------------|-----------------|
|             | Dark <sup>a</sup>              | Light <sup>b</sup> | PI <sup>c</sup> | Dark <sup>a</sup>             | Light <sup>b</sup> | PI <sup>c</sup> |
| <b>Ru1</b>  | <b>66.6±3.7</b>                | <b>21.6±2.4</b>    | <b>3.1</b>      | <b>&gt;100</b>                | <b>53.7±2.4</b>    | <b>1.9</b>      |
| <b>Ru2</b>  | <b>67.2±2.1</b>                | <b>0.66±0.09</b>   | <b>101.8</b>    | <b>&gt;100</b>                | <b>4.2±1.9</b>     | <b>23.8</b>     |
| <b>5-FU</b> | <b>&gt;200</b>                 | <b>&gt;200</b>     | <b>n.a.</b>     | <b>&gt;200</b>                | <b>&gt;200</b>     | <b>n.a.</b>     |
| <b>Ce6</b>  | <b>32.4±1.6</b>                | <b>0.25±0.02</b>   | <b>129.6</b>    | <b>17.5±1.6</b>               | <b>1.4±1.1</b>     | <b>12.5</b>     |

<sup>a</sup>48 h drug exposure in the dark.

<sup>b</sup>16h drug exposure in the dark, followed by white light irradiation (11.6 J/cm<sup>2</sup>) for 5 min and further 32 h incubation.

<sup>c</sup>PI = IC<sub>50</sub>(Dark<sup>a</sup>) / IC<sub>50</sub> (Light<sup>b</sup>).

5-FU =5-Fluorouracil , n.a. = Not applicable.

|                  | A549/DDP(21% O <sub>2</sub> ) |                    |                 | A549(5% O <sub>2</sub> ) |                    |                 |
|------------------|-------------------------------|--------------------|-----------------|--------------------------|--------------------|-----------------|
|                  | Dark <sup>a</sup>             | Light <sup>b</sup> | PI <sup>c</sup> | Dark <sup>a</sup>        | Light <sup>b</sup> | PI <sup>c</sup> |
| <b>Ru1</b>       | <b>51.4±3.2</b>               | <b>11.8±1.9</b>    | <b>4.4</b>      | <b>&gt;100</b>           | <b>&gt;100</b>     | <b>n.a.</b>     |
| <b>Ru2</b>       | <b>&gt;100</b>                | <b>0.13±0.03</b>   | <b>769.2</b>    | <b>62.8±2.3</b>          | <b>1.2±0.6</b>     | <b>52.3</b>     |
| <b>Cisplatin</b> | <b>15.5±2.2</b>               | <b>11.8±0.4</b>    | <b>1.3</b>      | <b>77.6±2.9</b>          | <b>74.1±3.1</b>    | <b>1.0</b>      |
| <b>Ce6</b>       | <b>63.5±1.7</b>               | <b>0.36±0.2</b>    | <b>176.4</b>    | <b>21.4±2.4</b>          | <b>8.0±1.2</b>     | <b>2.7</b>      |

<sup>a</sup>48 h drug exposure in the dark.

<sup>b</sup>16h drug exposure in the dark, followed by white light irradiation (11.6 J/cm<sup>2</sup>) for 5 min and further 32 h incubation.

<sup>c</sup>PI = IC<sub>50</sub>(Dark<sup>a</sup>) / IC<sub>50</sub>(Light<sup>b</sup>).

n.a. = Not applicable.

**Table S3.** Dark and photo IC<sub>50</sub> values (μM) and photo-cytotoxicity index (PI = IC<sub>50</sub> dark/IC<sub>50</sub> light) in A549/DDP cells under normoxic and hypoxic conditions

**Table S4.** Photo IC<sub>50</sub> values (μM) in A549 cells under different photo dose.

|                             | 5.8 J/cm <sup>2</sup> | 11.6 J/cm <sup>2</sup> | 23.2 J/cm <sup>2</sup> |
|-----------------------------|-----------------------|------------------------|------------------------|
| Light IC <sub>50</sub> (μM) | 0.93±0.08             | 0.29±0.04              | 0.26±0.009             |

**Table S5.** Photo IC<sub>50</sub> values (μM) and photo-cytotoxicity index (PI = IC<sub>50</sub> dark/IC<sub>50</sub> light) in A549 cells of various Ruthenium complexes.

|                                      | Light IC <sub>50</sub> (μM) | PI  |
|--------------------------------------|-----------------------------|-----|
| Ru (Reported by Glazer) <sup>1</sup> | 1.1 ± 0.3                   | 136 |
| Ru (Reported by Glazer) <sup>1</sup> | 1.2 ± 0.1                   | 208 |
| Ru (Reported by Bonnet) <sup>2</sup> | 6.5                         | 9.1 |
| Ru (Reported by Zhou) <sup>3</sup>   | 11.2 ± 0.2                  | 3   |
| Ru2                                  | 0.29±0.04                   | 224 |

#### 4. References

- 1 B. S. Howerton, D. K. Heidary and E. C. Glazer, *J. Am. Chem. Soc.*, 2012, **134**, 8324-8327.
- 2 C. Chen, J. A. Cuello-Garibo, L. Bretin, L. Zhang, V. Ramu, Y. Aydar, Y. Batsiun, S. Bronkhorst, Y. Husiev, N. Beztsinna, L. Chen, X. Zhou, C. Schmidt, I. Ott, M. J. Jager, A. M. Brouwer, B. E. Snaar-Jagalska and S. Bonnet, *Chem.Sci.*, 2022, **13**, 6899-6919.
- 3 C. Zhang, X. Guo, X. Da, Z. Wang, X. Wang and Q. Zhou, *Dalton Trans.*, 2021, **50**, 10845-10852.
